# Supplementary material for: Qbd-Based Approach to Optimize Niosomal Gel of Levosulpiride for Transdermal Drug Delivery
Source: MDPI journal article supplement (doi:10.3390/gels9030213), 2023-03-10
Supplement: s1 [file s1]

# Qbd-Based Approach to Optimize Niosomal Gel of Levosulpiride for Transdermal Drug Delivery

Ahmed S. Alnaim <sup>1,\*†</sup>, Hiral Shah <sup>2,†</sup>, Anroop B. Nair <sup>1</sup>, Vivek Mewada <sup>3</sup>, Smit Patel <sup>2</sup>, Shery Jacob <sup>4</sup>, Bandar Aldhubiab <sup>1</sup>, Mohamed A. Morsy <sup>1,5</sup>, Rashed M. Almuqbil <sup>1</sup>, Pottathil Shinu <sup>6</sup> and Jigar Shah <sup>4,\*</sup>

**Table S1.** Preliminary trials (P1-P24) used for the selection of non-ionic surfactants in preparing Levosulpiride\*-loaded niosomes.

| Batches | Non-ionic surfactants | Surfactant: cholesterol (molar ratio) | Sonication time (min) | % entrapment efficiency |
|---------|-----------------------|---------------------------------------|-----------------------|-------------------------|
| P1      | Span 20               | 1:1                                   | 2                     | 56.34                   |
| P2      | Span 20               | 1:1                                   | 10                    | 58.71                   |
| P3      | Span 20               | 1:1                                   | 18                    | 53.67                   |
| P4      | Span 40               | 1:1                                   | 2                     | 61.23                   |
| P5      | Span 40               | 1:1                                   | 10                    | 64.21                   |
| P6      | Span 40               | 1:1                                   | 18                    | 60.34                   |
| P7      | Span 60               | 1:1                                   | 2                     | 57.34                   |
| P8      | Span 60               | 1:1                                   | 10                    | 58.76                   |
| P9      | Span 60               | 1:1                                   | 18                    | 54.33                   |
| P10     | Span 80               | 1:1                                   | 2                     | 54.45                   |
| P11     | Span 80               | 1:1                                   | 10                    | 58.41                   |
| P12     | Span 80               | 1:1                                   | 18                    | 52.23                   |
| P13     | Tween 20              | 1:1                                   | 2                     | 53.34                   |
| P14     | Tween 20              | 1:1                                   | 10                    | 55.71                   |
| P15     | Tween 20              | 1:1                                   | 18                    | 52.67                   |
| P16     | Tween 40              | 1:1                                   | 2                     | 55.23                   |
| P17     | Tween 40              | 1:1                                   | 10                    | 56.21                   |
| P18     | Tween 40              | 1:1                                   | 18                    | 53.34                   |
| P19     | Tween 60              | 1:1                                   | 2                     | 56.34                   |
| P20     | Tween 60              | 1:1                                   | 10                    | 58.76                   |
| P21     | Tween 60              | 1:1                                   | 18                    | 53.33                   |
| P22     | Tween 80              | 1:1                                   | 2                     | 54.45                   |
| P23     | Tween 80              | 1:1                                   | 10                    | 58.53                   |
| P24     | Tween 80              | 1:1                                   | 18                    | 51.11                   |

\*The drug used is 50 mg.

**Table S2.** ANOVA for the quadratic model for particle size.

| Source            | Sum of Squares | df | Mean Square | F-value  | p-value  |             |
|-------------------|----------------|----|-------------|----------|----------|-------------|
| Model             | 39357.57       | 9  | 4373.06     | 3087.23  | < 0.0001 | significant |
| A-Cholesterol     | 30368.80       | 1  | 30368.80    | 21439.32 | < 0.0001 |             |
| B-Span 40         | 50.00          | 1  | 50.00       | 35.30    | 0.0019   |             |
| C-Sonication time | 55.65          | 1  | 55.65       | 39.29    | 0.0015   |             |
| AB                | 2.89           | 1  | 2.89        | 2.04     | 0.2126   |             |
| AC                | 2.10           | 1  | 2.10        | 1.48     | 0.2774   |             |
| BC                | 0.0000         | 1  | 0.0000      | 0.0000   | 1.0000   |             |
| A <sup>2</sup>    | 4417.09        | 1  | 4417.09     | 3118.31  | < 0.0001 |             |
| B <sup>2</sup>    | 2949.30        | 1  | 2949.30     | 2082.10  | < 0.0001 |             |
| C <sup>2</sup>    | 2851.00        | 1  | 2851.00     | 2012.71  | < 0.0001 |             |

**Table S3.** ANOVA for the quadratic model for entrapment efficiency.

| Source            | Sum of Squares | df | Mean Square | F-value | p-value  |             |
|-------------------|----------------|----|-------------|---------|----------|-------------|
| <b>Model</b>      | 1887.66        | 9  | 209.74      | 147.33  | < 0.0001 | significant |
| A-Cholesterol     | 1676.20        | 1  | 1676.20     | 1177.45 | < 0.0001 |             |
| B-Span 40         | 168.36         | 1  | 168.36      | 118.26  | 0.0001   |             |
| C-Sonication time | 0.0338         | 1  | 0.0338      | 0.0237  | 0.8836   |             |
| AB                | 32.21          | 1  | 32.21       | 22.62   | 0.0051   |             |
| AC                | 0.0812         | 1  | 0.0812      | 0.0571  | 0.8207   |             |
| BC                | 0.4290         | 1  | 0.4290      | 0.3014  | 0.6066   |             |
| A <sup>2</sup>    | 6.31           | 1  | 6.31        | 4.43    | 0.0892   |             |
| B <sup>2</sup>    | 0.3150         | 1  | 0.3150      | 0.2213  | 0.6579   |             |
| C <sup>2</sup>    | 3.04           | 1  | 3.04        | 2.14    | 0.2035   |             |

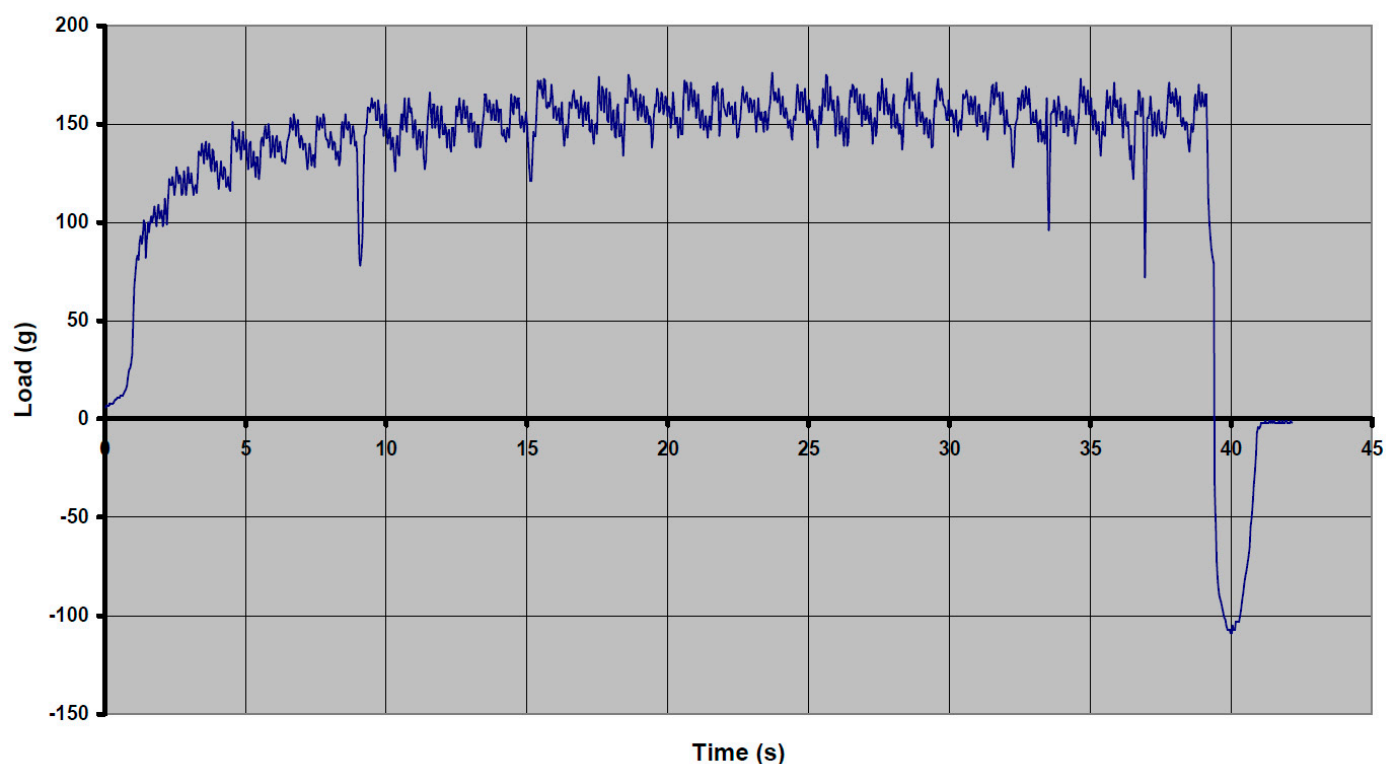**Figure S1.** Load versus time curve of hardness/adhesiveness force of niosomal gel.

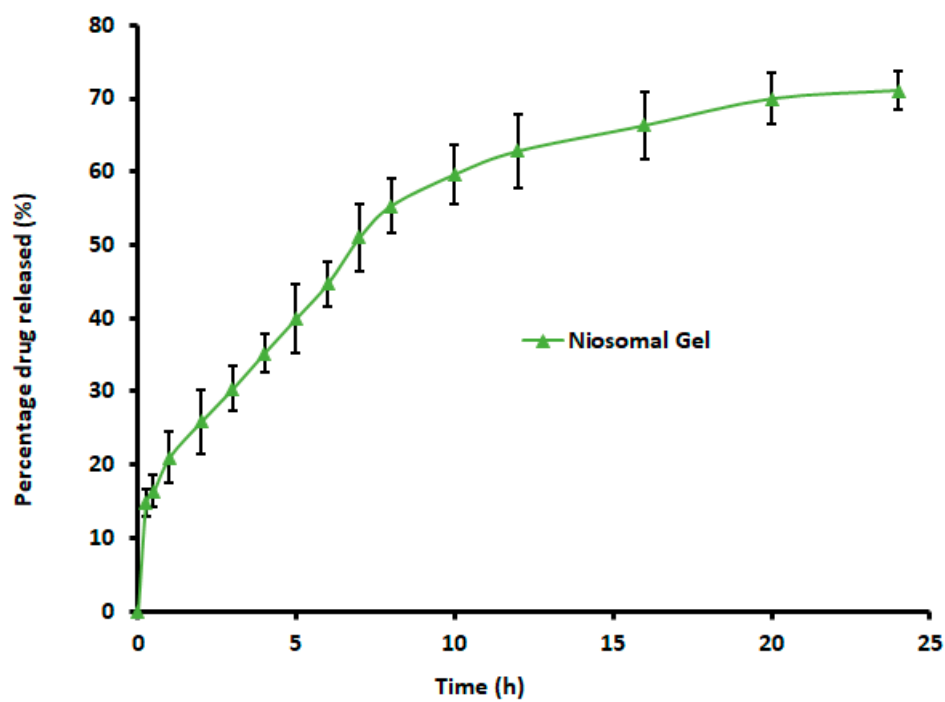

**Figure S2.** In vitro release profile of Levosulpiride from niosomal gel after three months of stability study.
